# Supplementary material for: Single-cell analyses of regulatory network perturbations using enhancer-targeting TALEs suggest novel roles for PU.1 during haematopoietic specification
Source: PubMed Central journal article supplement (PMC4197694; doi:10.1242/dev.115709), 2014-10
Supplement: supp_dev.115709_DEV115709.pdf [file supp_dev.115709_DEV115709.pdf]

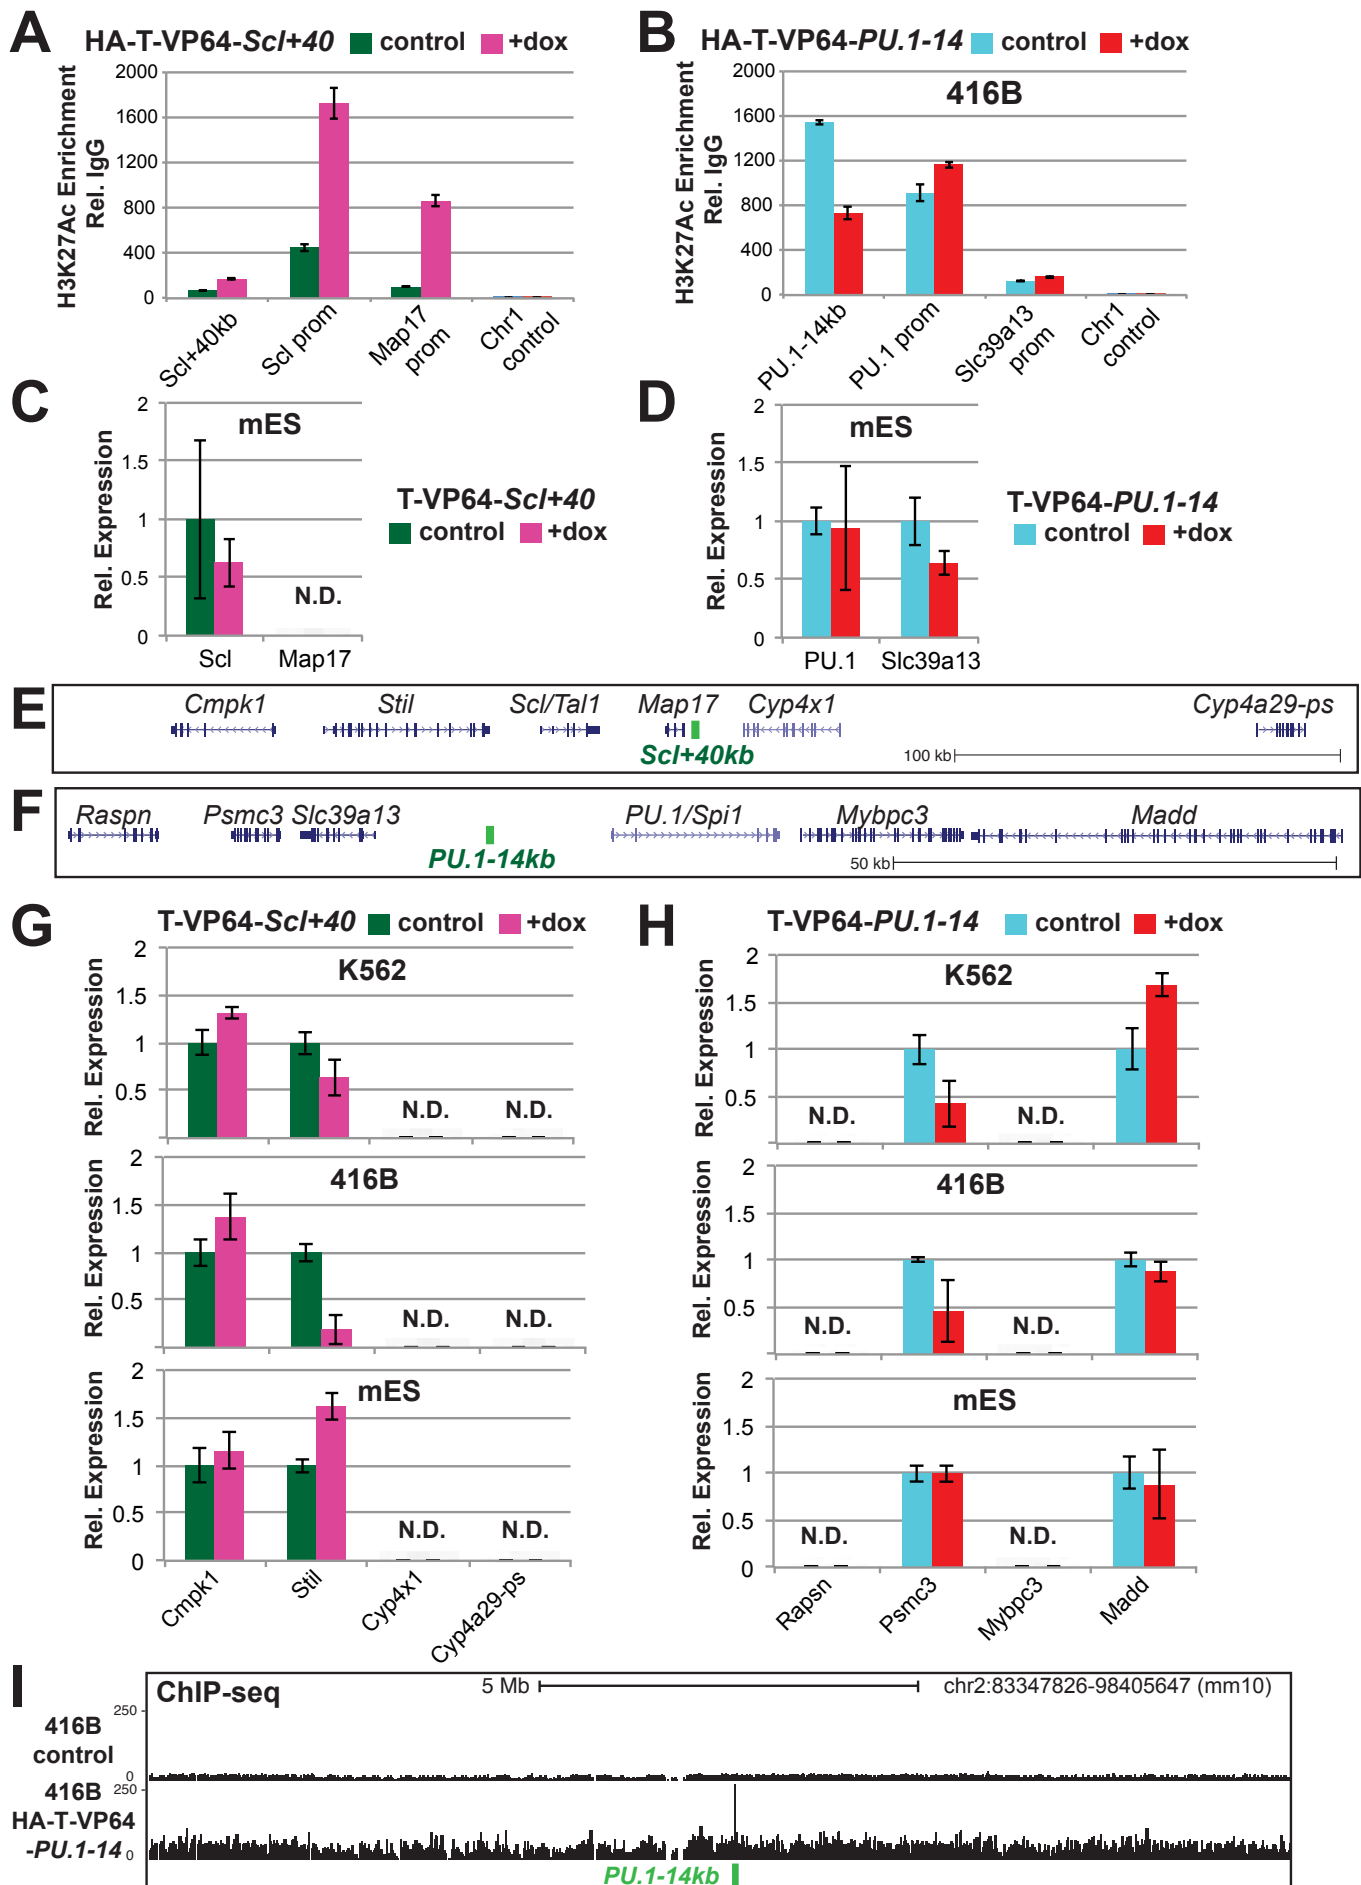

**Figure S1, related to Figure 1:**

(A) Effect of expressing HA-TALE-VP64 targeting the *Scl+40kb* (HA-T-VP64-*Scl+40*) for 48 hr in mouse 416B on histone 3 lysine 27 acetylation (H3K27Ac; relative to IgG enrichment) at the *Scl+40kb*, *Scl* promoter (prom), *Map17* prom and a control region on chromosome 1 (*chr1* control). HA-T-VP64-*Scl+40* expressed for 48 hr by addition of doxycycline (+dox; pink bars). Untransfected 416B used as control (green bars). Error bars are standard deviation of technical triplicates from one biological experiment.

(B) Effect of expressing HA-TALE-VP64 targeting the *PU.1-14kb* (HA-T-VP64-*PU.1-14*) in mouse 416B on histone 3 lysine 27 acetylation (H3K27Ac) ChIP-qPCR enrichment (relative to IgG enrichment) at the *PU.1-14kb*, *PU.1* prom, *Slc39a13* prom and *Chr1* control region. HA-T-VP64-*PU.1-14* expressed for 48 hr by addition of dox (+dox; red bars). Untransfected 416B used as control (blue bars). Error bars are standard deviation of technical triplicates from one biological experiment.

(C) Effect of expressing TALE-VP64 targeting the *Scl+40kb* (T-VP64-*Scl+40*) in mouse Ainv18 ES cells on *Scl* and *Map17* gene expression, normalised to *ActB*. T-VP64-*Scl+40* expressed for 48 hr by addition of dox and gene expression in +dox cells (green bars) determined relative to -dox control cells (pink bars). Error bars are standard deviation of technical triplicates from one biological experiment.

(D) Effect of expressing TALE-VP64 targeting the *PU.1-14kb* (T-VP64-*PU.1-14*) in mouse Ainv18 ES cells on *PU.1* and *Slc39a13* gene expression, normalised to *ActB*. T-VP64-*PU.1-14* expressed for 48 hr by addition of dox and gene expression in +dox cells (blue bars) determined relative to -dox control cells (red bars). Error bars are standard deviation of technical triplicates from one biological experiment.

(E) UCSC Genome Browser screen shot of RefSeq annotated genes within a ~300kb genomic window surrounding the *Scl+40kb* enhancer (highlighted in green).

(F) UCSC Genome Browser screen shot of RefSeq annotated genes within a ~150kb genomic window surrounding the *PU.1-14kb* enhancer (highlighted in green).

(G) Effect of expressing T-VP64-*Scl+40* in human K562 (top), mouse 416B and mouse Ainv18 ES cells on *Cmpk1*, *Stil*, *Cyp4x1* and *Cyp4a29-ps* gene expression, normalised to *ACTB/ActB*. T-VP64-*Scl+40* expressed for 48 hr by addition of dox and gene expression in +dox/mCherry<sup>+</sup> cells (green bars) determined relative to -dox/mCherry<sup>-</sup> control cells (pink bars). Error bars are standard deviation of technical triplicates from one biological experiment. Not detected; N.D

(H) Effect of expressing T-VP64-*PU.1-14* in human K562 (top), mouse 416B and mouse Ainv18 ES cells on *Rapsn*, *Psmc3*, *Mybpc3* and *Madd* gene expression, normalised to *ACTB/ActB*. T-VP64-*PU.1-14* expressed for 48 hr by addition of dox and gene expression in +dox/mCherry<sup>+</sup> cells (blue bars) determined relative to -dox/mCherry<sup>-</sup> control cells (red bars). Error bars are standard deviation of technical triplicates. Not detected; N.D

(I) UCSC Genome Browser screenshot of HA antibody ChIP-Seq enrichment in a ~15Mb window surrounding the *PU.1-14kb* element in wild type (above) and T-VP64-*PU.1-14* expressing (below) 416B cells.

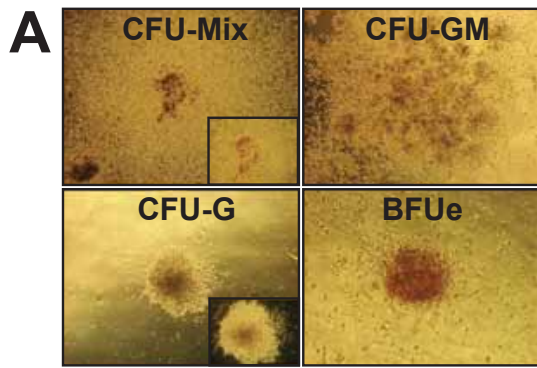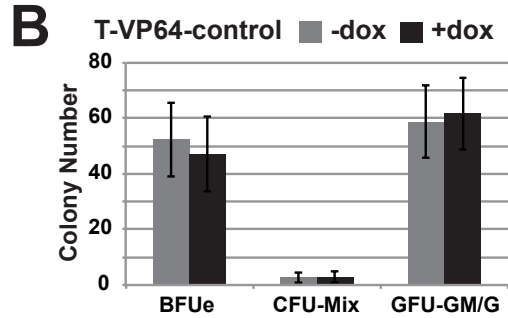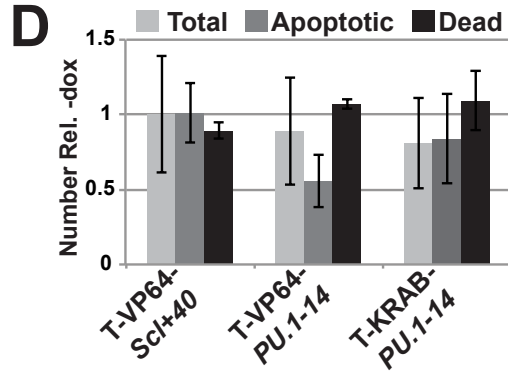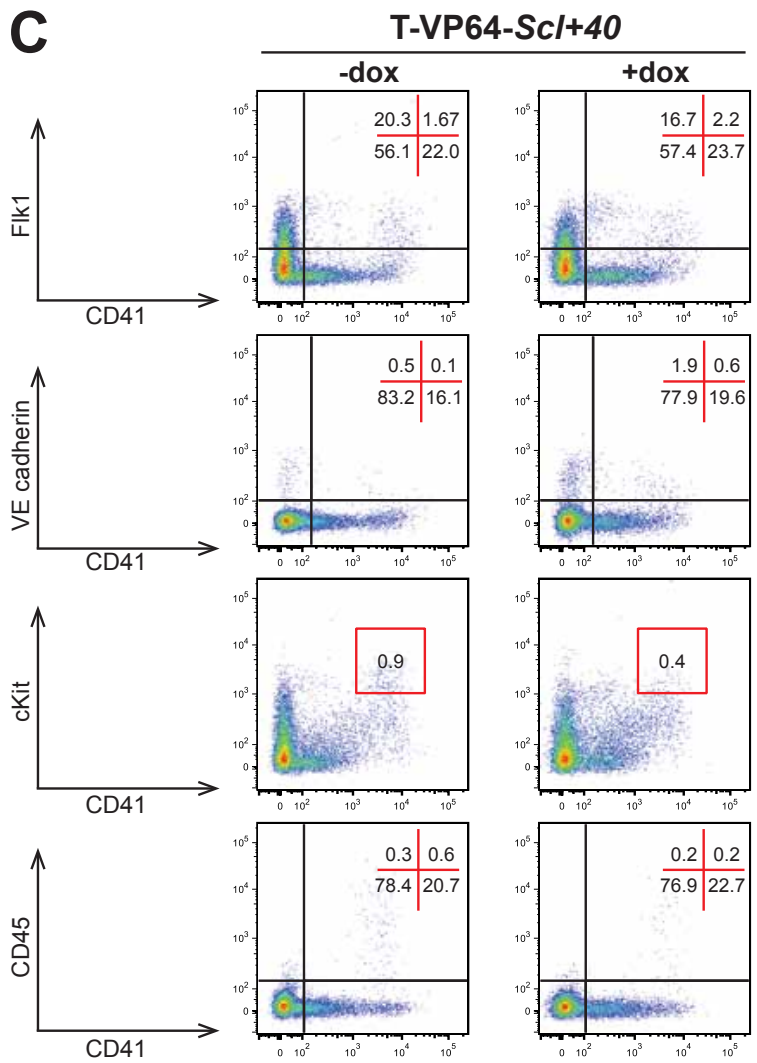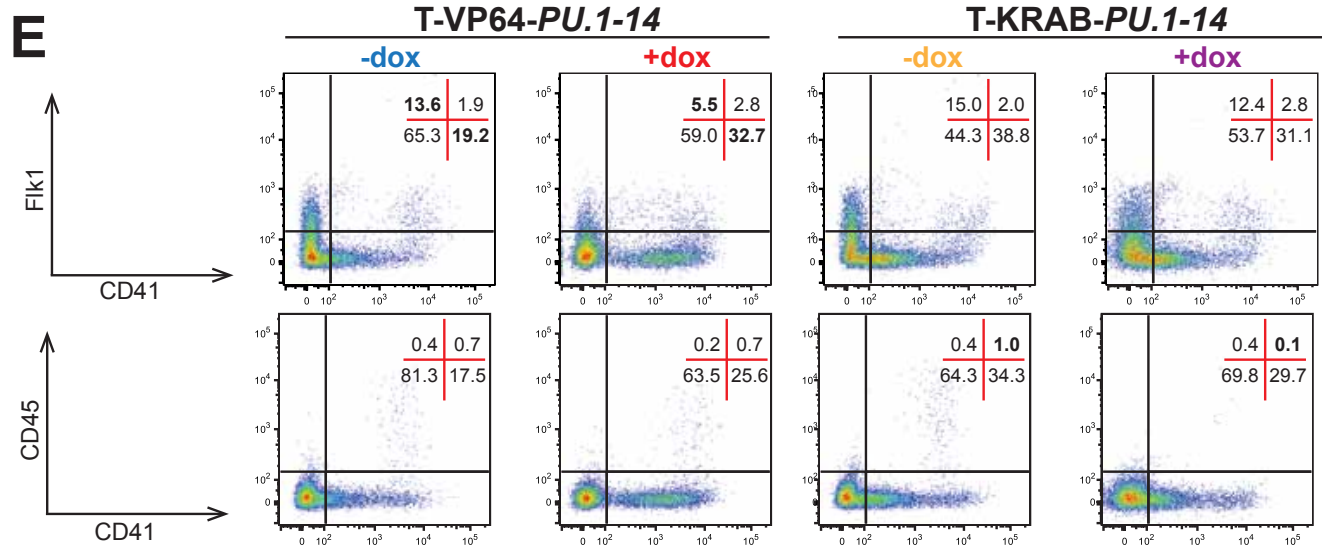

**F**

| Population  | T-VP64-PU.1-14 EB absolute cell numbers |               |         |
|-------------|-----------------------------------------|---------------|---------|
|             | (-)dox                                  | (+)dox        | p value |
| Fik1+       | 164633±80581                            | 47503±41865   | <0.01   |
| CD41+       | 157083±135844                           | 143550±115053 | N.S     |
| CD41+VEcad+ | 2213±2299                               | 12852±11881   | <0.05   |
| CD41+cKit+  | 11445±8974                              | 1945±1503     | <0.05   |

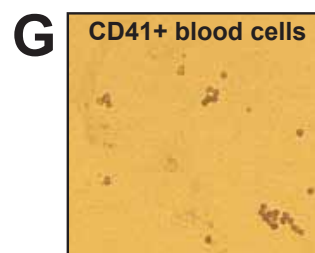

**Figure S2**

**Figure S2, related to Figure 2:**

(A) Representative images of haematopoietic colonies scored in methylcellulose CFU assays in Figures 2C and S2B. Red coloured erythroid colonies of at least ~30 small cells dispersed within small clusters with tight cell-cell junctions were scored as burst forming unit erythroid (BFUe). Colonies of at least ~50 small round bright cells (often tightly packed with grey centre) were scored as colony forming unit-granulocyte (CFU-G). Large colonies of over ~200 cells containing both granulocytes (as described above) and macrophages (large round cells, less bright than granulocytes and often more dispersed) were scored as colony forming unit-granulocyte macrophage (CFU-GM). Large colonies of over ~200 cells, densely packed, including red erythroid cells (similar to those described above) as well as at least two other lineages (usually granulocytes and macrophages described above) or megakaryocytes were scored as colony forming unit-mix (CFU-Mix).

(B) Representative haematopoietic colonies numbers from  $1 \times 10^5$  day 6 EB cells derived from mouse ES cells inducible expressing a non-functional TALE-VP64 (due to mutations within the DNA binding domain), previously generated (Gao et al., 2013). As in Figure 2C, dox added to EBs day 4 to induce TALE-VP64 expression. Colonies grown in methylcellulose supplemented with SCF, IL-3, IL-6 and Epo. Error bars are standard deviation of technical triplicates. No statistically significant changes in CFU numbers were seen from three biological triplicates, as determined by the student t test.

(C) Flow cytometry plots of day 6 EB cells showing (from top to bottom) Flk1 vs. CD41, VE cadherin (VEcad) vs. CD41, cKit vs. CD41, CD45 vs. CD41). Representative staining patterns for a T-VP64-*Scf+40* expressing mouse ES cell line, both uninduced (-dox) and induced (from day 4; +dox). Distribution of cells within quadrant/gates shown as percentages.

(D) Total number (light grey bars), frequency of apoptotic (Annexin V<sup>+</sup> DAPI<sup>+</sup>; dark grey bars) and frequency of dead (Annexin V<sup>+</sup> DAPI<sup>+</sup>; black bars) T-VP64-*Scf+40*, T-VP64-*PU.1-14* and T-KRAB-*PU.1-14* expressing EB day 6 cells (+dox from day 4) relative to -dox controls. Error bars are standard deviation of three biological replicates. No statistically significant changes were seen from three biological triplicates, as determined by the student t test.

(E) Flow cytometry plots of day 6 EB cells showing Flk1 vs. CD41 (top) and CD41 vs. CD45 (bottom). Representative staining patterns for TALE-VP64 (left) and TALE-KRAB (right) targeting *PU.1-14kb* clones, both uninduced (-dox) and induced (from day 4; +dox). Distribution of cells within quadrant/gates shown as percentages.

(F) Table displaying absolute cells numbers for cells populations identified by flow cytometry in Figure 2D  $\pm$  standard deviation from three biological replicates, and p values (using the student t test). N.S; not significant.

(G) Representative image of day 4 EB Flk1<sup>+</sup>-derived colony containing haematopoietic (round, budding) CD41<sup>+</sup> (stained black) cells scored in Figure 2E. Colonies containing endothelial cells that stained weakly CD41<sup>+</sup> were not scored unless haematopoietic cells were also present.

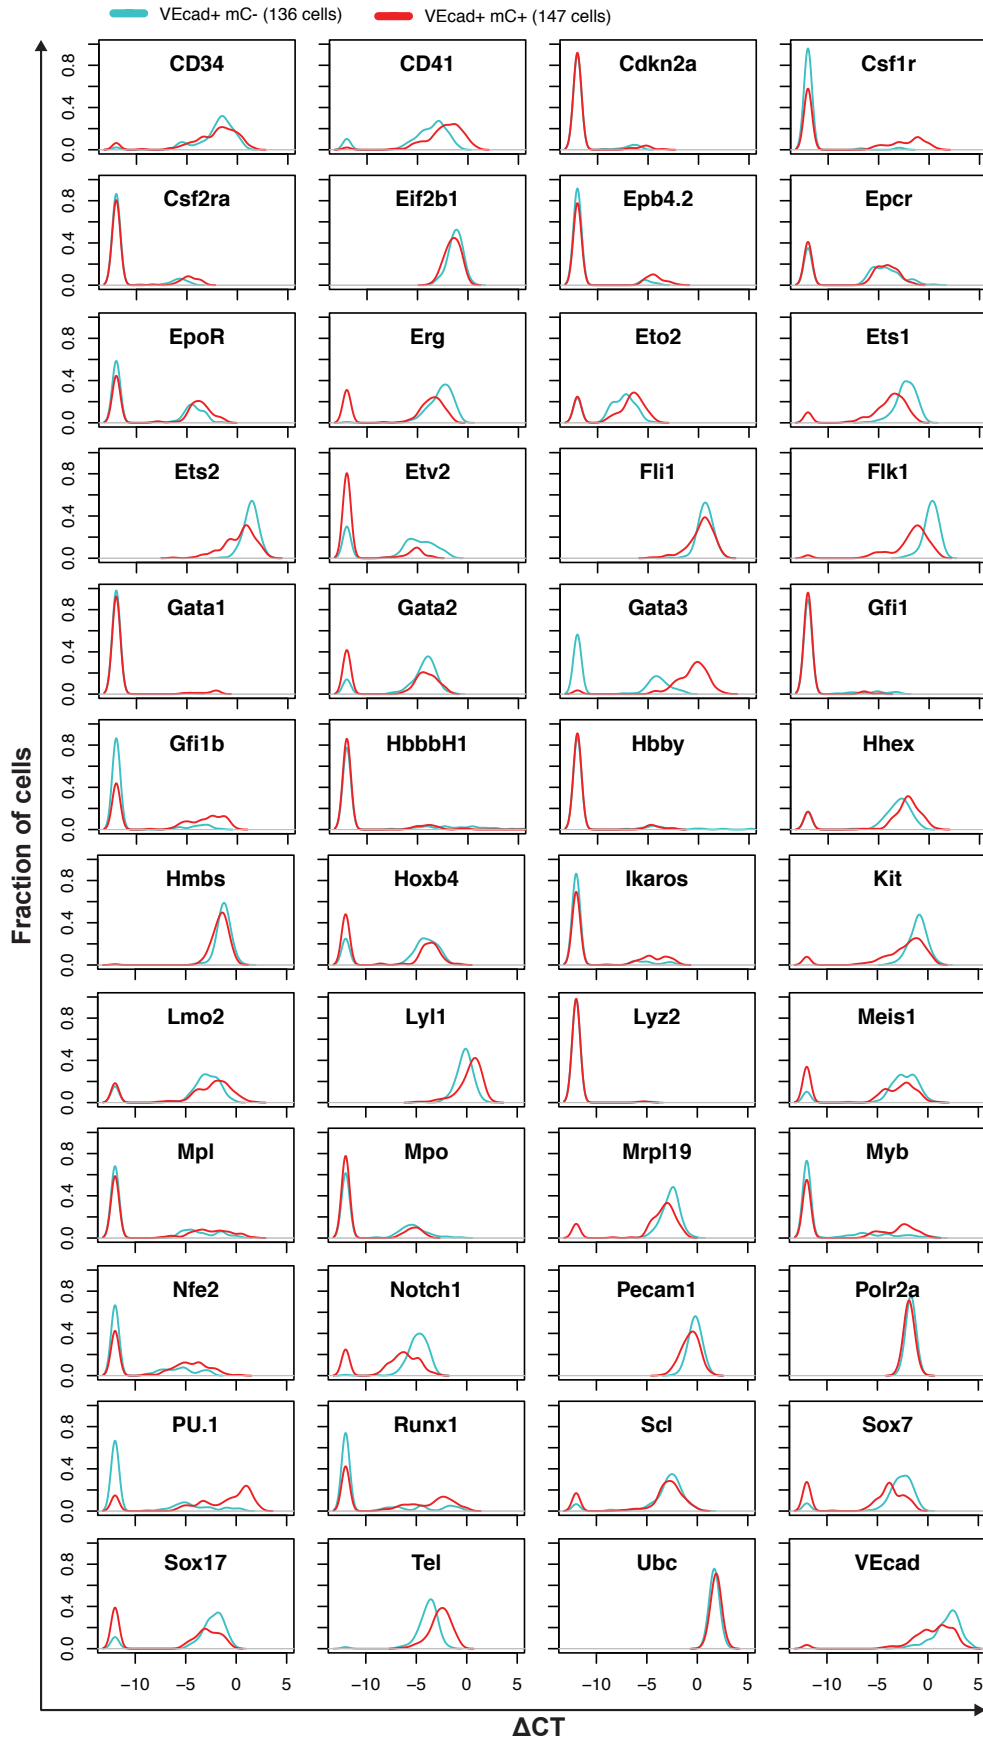

**Figure S3**

**Figure S3, related to Figure 3:**

Density plots of gene expression in day 6 EB VECad<sup>+</sup> mCherry<sup>-</sup> (136 WT Ainv18; in cyan) and VECad<sup>+</sup> mCherry<sup>+</sup> (147 Ainv18 expressing T-VP64-*PU.1-14*; in red) for all 48 genes analysed. The density indicates the fraction of cells at each expression level, relative to housekeeping genes (*Polr2a* and *Ubc*). Cells with non-detected gene expression set to -12.

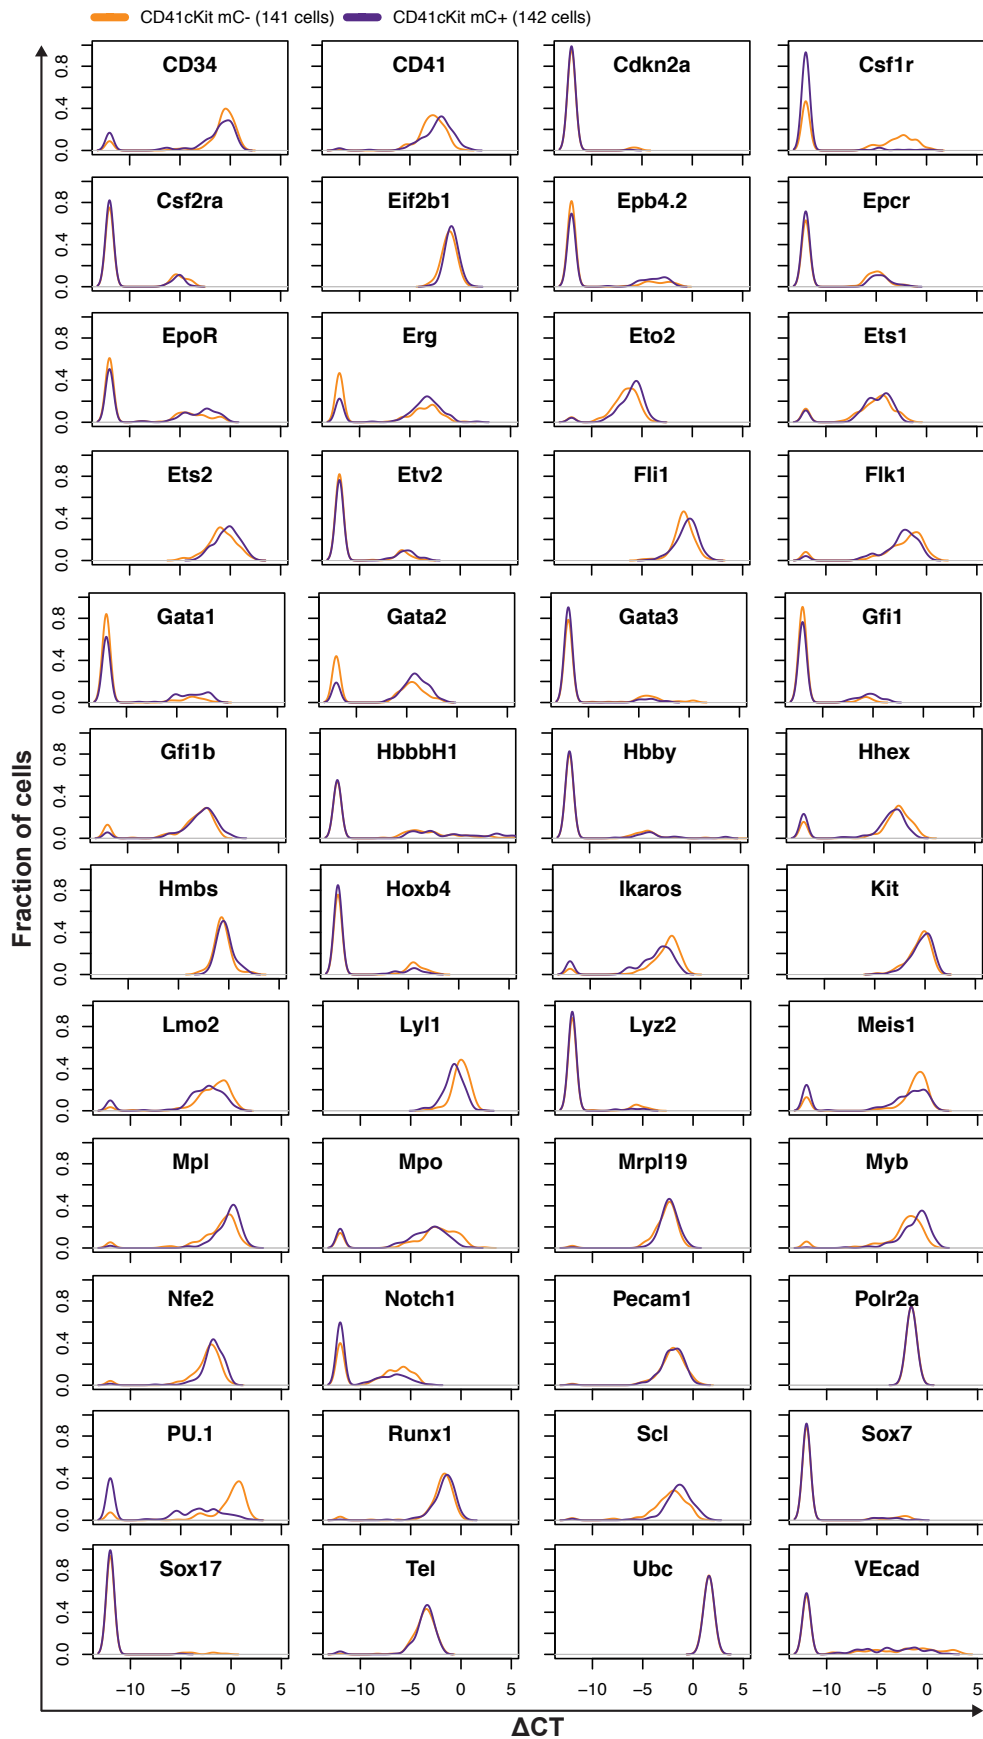

**Figure S4**

**Figure S4, related to Figure 4:**

Density plots of gene expression in day 6 EB CD41<sup>+</sup>cKit<sup>hi</sup> mCherry<sup>-</sup> (141 WT Ainv18; in orange) and CD41<sup>+</sup>cKit<sup>hi</sup> mCherry<sup>+</sup> (142 Ainv18 expressing T-KRAB-*PU.1-14*; in purple) for all 48 genes analysed. The density indicates the fraction of cells at each expression level, relative to housekeeping genes (*Polr2a* and *Ubc*). Cells with non-detected gene expression set to -12.

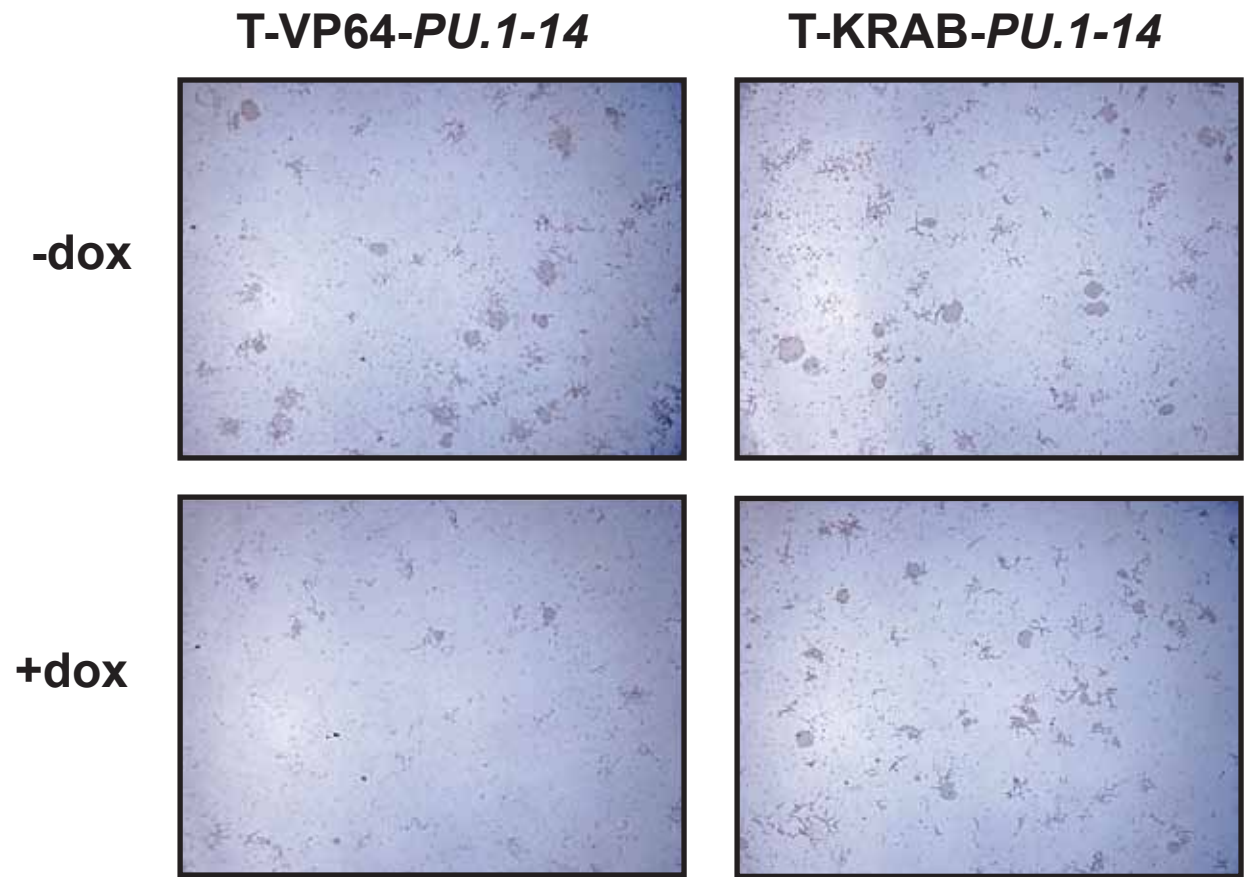

**Figure S5, related to Figure 4:**

Representative images of endothelial colony assays from day 6 EB VECad<sup>+</sup> cells from T-VP64-*PU.1-14* or T-KRAB-*PU.1-14* ES cell lines as described in Figure 4.

## WT and PU.1-YFP transgenic embryos E10.5 AGM/VUA region

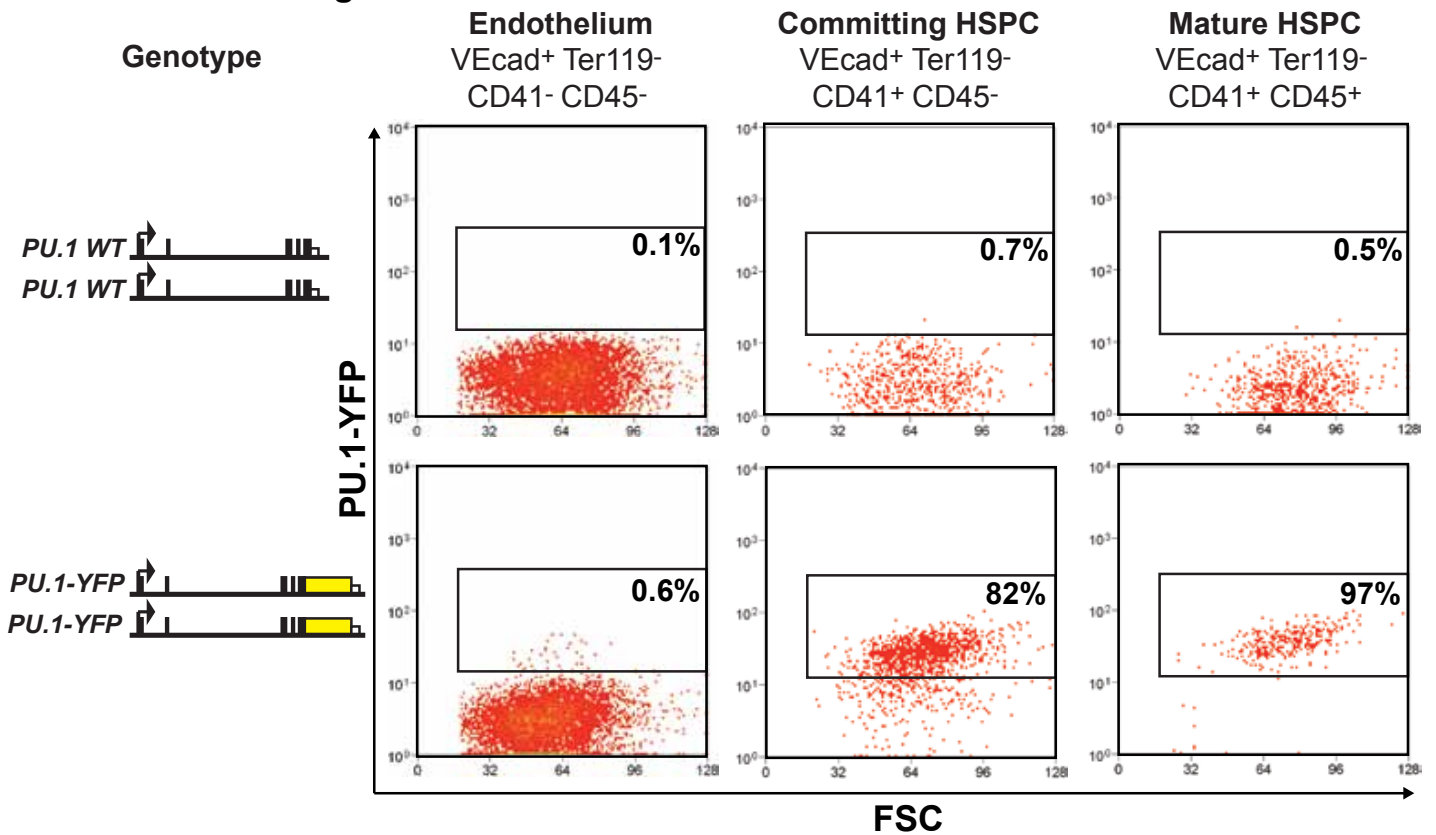

**Figure S6, related to Figure 7:**

Alternative analysis of flow cytometry data from Figure 6B,C, plots displaying PU.1-YFP expression vs. FSC for VEcad<sup>+</sup> Ter119<sup>-</sup> CD41<sup>-</sup> CD45<sup>-</sup> (left), VEcad<sup>+</sup> Ter119<sup>-</sup> CD41<sup>+</sup> CD45<sup>-</sup> (middle) and VEcad<sup>+</sup> Ter119<sup>-</sup> CD41<sup>+</sup> CD45<sup>+</sup> (right) populations from the AGM+VUA region of pooled E10.5 WT (above) and PU.1-YFP (below) embryos.

### Supplementary Table 1: Partial Correlation Analysis

[Download Table S1](#)

### Supplementary Table 2: Partial Correlation Analysis

[Download Table S2](#)



**Supplementary Table 3: Flow Cytometry Antibodies**

| <b>Antibody</b>    | <b>Supplier</b> | <b>Cat. Number</b> | <b>Clone ID</b> | <b>Reactivity</b> |
|--------------------|-----------------|--------------------|-----------------|-------------------|
| CD16/32 (Fc block) | BD              | 553142             | 2.4G2           | Mouse             |
| CD41-PE-Cy7        | Biolegend       | 25-0411-82         | eBioMWReg30     | Mouse             |
| CD41-APC           | eBioscience     | 17-0411            | MWReg30         | Mouse             |
| CD45-APC           | Biolegend       | 103112             | 30-F11          | Mouse             |
| Flk1-APC           | BD              | 560070             | Avas 12a1       | Mouse             |
| Flk1-PE            | BD              | 561052             | Avas 12a1       | Mouse             |
| VEcad-PE-Cy7       | Biolegend       | 92055              | VECD1           | Mouse             |
| cKit-APC           | BD              | 553356             | 2B8             | Mouse             |

**Supplementary Table 4: RT-qPCR primers**

| <b>Primer name</b>               | <b>Sequence</b>            |
|----------------------------------|----------------------------|
| <i>Human ACTB forward</i>        | AGAGCTACGAGCTGCCTGAC       |
| <i>Human ACTB reverse</i>        | AGCACTGTGTTGGCGTACAG       |
| <i>Human SCL/TAL1 forward</i>    | TTCCCTATGTTCCACCACAA       |
| <i>Human SCL/TAL1 reverse</i>    | AAGATACGCCGCACAACCTTT      |
| <i>Human MAP17 forward</i>       | TGCCTATGAGAATGTGCCG        |
| <i>Human MAP17 reverse</i>       | TGGACATCCATCCCATGTGC       |
| <i>Human PU.1/SPI-1 forward</i>  | CGGCTGGATGTTACAGGCGTG      |
| <i>Human PU.1/SPI-1 reverse</i>  | TCGTGCGTTTGGCGTTGG         |
| <i>Human SLC39A13 forward</i>    | TTCCCCTAGAGATGGGGACC       |
| <i>Human SLC39A13 reverse</i>    | GGCAGCAGATGCAGAAACAC       |
| <i>Human PSMC3 forward</i>       | ACAGACGTA CTTCTTCC         |
| <i>Human PSMC3 reverse</i>       | CCAATGAACATCTGCACCAG       |
| <i>Human RAPSN forward</i>       | GTACGACTCCGCCATGAGCA       |
| <i>Human RAPSN reverse</i>       | ATGGCATCCAGAGCCTTGTC       |
| <i>Human MYBPC3 forward</i>      | GCTCTTCCAGACCCATCTCG       |
| <i>Human MYBPC3 reverse</i>      | CAGCGGGATGACAGGAAACA       |
| <i>Human MADD forward</i>        | TAGTGATCGTAGGGGCCAGG       |
| <i>Human MADD reverse</i>        | GCAGGGGAAACTCAGTGTGA       |
| <i>Human STIL forward</i>        | ATGCACATAACGTGGATCACG      |
| <i>Human STIL reverse</i>        | TCCATGCTCAAATCCACACC       |
| <i>Human CMPK1 forward</i>       | TTCATGAAGCCGCTGGT          |
| <i>Human CMPK1 reverse</i>       | TCCTGCAGAAAGGTGTGTGT       |
| <i>Human CYP4X1 forward</i>      | TCAGGACACAAGCGTGGAGGTCTA   |
| <i>Human CYP4X1 reverse</i>      | TGCATAAGGATCATGGGTGCTGTT   |
| <i>Human CYP4A29-PS forward</i>  | CTGCTTTTCAAGGCAGCACA       |
| <i>Human CYP4A29-PS forward</i>  | CTGCAAGCAATGCCCAAAGA       |
| <i>Mouse Actb forward</i>        | TCCTGGCCTCACTGTCCAC        |
| <i>Mouse Actb reverse</i>        | GTCCGCCTAGAAGCACTTGC       |
| <i>Mouse Scl/Tal1 forward</i>    | CATGTTACCAACAACAACCG       |
| <i>Mouse Scl/Tal1 reverse</i>    | GGTGTGAGGACCATCAGAAATCTC   |
| <i>Mouse Map17 forward</i>       | GTCCTTGTTGCAATCGTCTTC      |
| <i>Mouse Map17 reverse</i>       | GAGGAGTATCTGCCATCCATTC     |
| <i>Mouse PU.1/Sfpi-1 forward</i> | AGAGCATAACCAACGTCCAATG C   |
| <i>Mouse PU.1/Sfpi-1 reverse</i> | GTGCGGAGAAATCCCAGTAGTG     |
| <i>Mouse Slc39a13 forward</i>    | TTGCTGGTCATTCCTCCCTGGA     |
| <i>Mouse Slc39a13 reverse</i>    | GTCCACCTAAGGCAAAGCTGA      |
| <i>Mouse Psmc3 forward</i>       | GACCGTGTGGGATGAAGCTG       |
| <i>Mouse Psmc3 reverse</i>       | CGCTGGACAATCTCTTCCGTG      |
| <i>Mouse Rapsn forward</i>       | ATATCGGGCCATGAGCCAGT       |
| <i>Mouse Rapsn reverse</i>       | TCACAACACTCCATGGCACTGC     |
| <i>Mouse Mybpc3 forward</i>      | TGAAGGGTCAGTCTCGGTAACC     |
| <i>Mouse Mybpc3 reverse</i>      | TCCTGTGGTCGCATCAGAAA       |
| <i>Mouse Madd forward</i>        | AAGAAACTGGGCATCCCTCG       |
| <i>Mouse Madd reverse</i>        | GAAGGGCACTGGACTTCTCC       |
| <i>Mouse Stil forward</i>        | GGTGATGATCAAGAGCCCGA       |
| <i>Mouse Stil reverse</i>        | ACCAGGTTCTTTGCTCTGCT       |
| <i>Mouse Cmpk1 forward</i>       | TCAGAAGCGCGTTGTATGCT       |
| <i>Mouse Cmpk1 reverse</i>       | AAAACGAACACGACCAACGG       |
| <i>Mouse Cyp4x1 forward</i>      | CCTGGACATAATAATGAAATGTGCTT |
| <i>Mouse Cyp4x1 reverse</i>      | CTTCACGTAAGACTCATAGGTGCC   |
| <i>Mouse Cyp4a29-ps forward</i>  | CAGTGCACCATCTGGACCTC       |
| <i>Mouse Cyp4a29-ps reverse</i>  | GATTACGTAATAGTGGTCCCTCAGG  |

**Supplementary Table 5: Taqman assays used for single cell gene expression**

| <b>Protein name</b> | <b>Assay ID</b> |
|---------------------|-----------------|
| Csf1r/c-fms         | Mm01266652_m1   |
| CD34                | Mm00519283_m1   |
| CD41                | Mm00439768_m1   |
| Cdkn2a              | Mm00494449_m1   |
| Csf2ra              | Mm00438331_g1   |
| Eif2b1              | Mm01199614_m1   |
| Epb4.2              | Mm00469107_m1   |
| Epcr                | Mm00440993_mH   |
| EpoR                | Mm00438760_m1   |
| Erg                 | Mm01214246_m1   |
| Eto2                | Mm00486780_m1   |
| Ets1                | Mm01175819_m1   |
| Ets2                | Mm00468977_m1   |
| Etv2                | Mm00468389_m1   |
| Fli1                | Mm00484409_m1   |
| Flk1                | Mm01222421_m1   |
| Gata1               | Mm00484678_m1   |
| Gata2               | Mm00492300_m1   |
| Gata3               | Mm00484683_m1   |
| Gfi1                | Mm00515855_m1   |
| Gfi1b               | Mm00492318_m1   |
| Hbb-bH1             | Mm00756487_mH   |
| Hbb-y               | Mm00433936_g1   |
| hHex                | Mm00433954_m1   |
| Hmbs                | Mm01143545_m1   |
| Hoxb4               | Mm00657964_m1   |
| Ikaros              | Mm01187882_m1   |
| Kit                 | Mm00445212_m1   |
| Lmo2                | Mm01281680_m1   |
| Lyl1                | Mm01247198_m1   |
| Lyz2                | Mm01612741_m1   |
| Meis1               | Mm00487659_m1   |
| Mpl                 | Mm00440310_m1   |
| Mpo                 | Mm00447886_m1   |
| Mrpl19              | Mm03048937_m1   |
| Myb                 | Mm00501741_m1   |
| Nfe2                | Mm00801891_m1   |
| Notch1              | Mm00435249_m1   |
| Pecam1              | Mm01242584_m1   |
| Polr2a              | Mm00839493_m1   |
| PU.1                | Mm00488142_m1   |
| Runx1               | Mm01213405_m1   |
| Scl/Tal1            | Mm01187033_m1   |
| Sox17               | Mm04208182_m1   |
| Sox7                | Mm00776876_m1   |
| Tel                 | Mm01261325_m1   |
| Ubc                 | Mm01201237_m1   |
| VE cadherin         | Mm00486938_m1   |

**Supplementary Table 6: ChIP-qPCR primers**

| <b>Primer name</b>         | <b>Sequence</b>          |
|----------------------------|--------------------------|
| <i>Scl promoter F</i>      | CATGCGCACTCCAGCCTC       |
| <i>Scl promoter R</i>      | CACACACCGCCCAGAAGC       |
| <i>Map17 promoter F</i>    | ACAAGGTAGCACAGGACAGG     |
| <i>Map17 promoter R</i>    | TCCAAAACACCACCCCATCC     |
| <i>Scl+40kb F</i>          | CTCTTCCTTATCGCCAGCTC     |
| <i>Sc+40kb R</i>           | CAGCTGGTGCCTTATCAGTT     |
| <i>PU.1 promoter F</i>     | GGGCCATTGGCTTCCTTAGA     |
| <i>PU.1 promoter R</i>     | AATAGCTGTTTCAGGCCCCAC    |
| <i>Slc39a13 promoter F</i> | AGAGTAGGACGGAAGTGGGTA    |
| <i>Slc39a13 promoter R</i> | CTGTTGATCCCGGTTCCCG      |
| <i>PU.1-14kb F</i>         | GCTGTTGGCGTTTTGCAAT      |
| <i>PU.1-14kb R</i>         | GGCCGGTGCCTGAGAAA        |
| <i>Chr1 control</i>        | CATAGATGAAGCTGCCACATAGGT |
| <i>Chr1 control</i>        | GTGGGCAAGGACAAAGCATTA    |

**Supplementary Table 7: Genomic PCR cloning primers**

| <b>Primer</b>      | <b>Sequence</b>               |
|--------------------|-------------------------------|
| <i>PU.1prom_F</i>  | taaagatctCACCAGAGGGGACTGAGAAG |
| <i>PU.1prom_R</i>  | taaaagcttGCTGAGCTCCAGGTTGGTC  |
| <i>PU.1-14kb_F</i> | taaggatccGCTTGGGTGCTGGACTTAGA |
| <i>PU.1-14kb_R</i> | taagtcgacGACCTTTCCTTGGGTGAGC  |
| <i>PU.1-18kb_F</i> | taaggatccGGAGGGCTGTGTCAGTCAGA |
| <i>PU.1-18kb_R</i> | taagtcgacCTTCTCCATCCCACAGAGC  |
